# Supplementary material
Source: PubMed Central journal article supplement (PMC3838270)
Supplement: JVI.02116-13_zjv999098394so2.pdf [file JVI.02116-13_zjv999098394so2.pdf]

**Supplementary Movie 1** Movie depicts time-lapse sequence acquired by spinning disk confocal microscopy (63x lens, 6 min intervals), of OK cells stably expressing LC3-GFP and infected with EHDV2-IBA from 36 to 60 hpi.
